# Supplementary material
Source: ML conference proceedings conference paper supplement (https://openaccess.thecvf.com/content/CVPR2021/html/Yin_Learning_To_Recommend_CVPR_2021_paper.html)
Supplement: Supplementary file 1 [file Yin_Learning_To_Recommend_CVPR_2021_supplemental.pdf]

# Supplementary Material for Learning to Recommend Frame for Interactive Video Object Segmentation in the Wild

Zhaoyuan Yin<sup>1</sup>, Jia Zheng<sup>2</sup>, Weixin Luo<sup>3</sup>, Shenhan Qian<sup>4</sup>, Hanling Zhang<sup>5\*</sup>, Shenghua Gao<sup>4,6</sup>

<sup>1</sup>College of Computer Science and Electronic Engineering, Hunan University

<sup>2</sup>KooLab, Manycore <sup>3</sup>Meituan Group

<sup>4</sup>ShanghaiTech University <sup>5</sup>School of Design, Hunan University

<sup>6</sup>Shanghai Engineering Research Center of Intelligent Vision and Imaging

{zyyin, jh\_hlzhang}@hnu.edu.cn jiajia@qunhemail.com luoweixin@meituan.com

{qianshh, gaoshh}@shanghaitech.edu.cn

In this supplementary material, we first present the details of the network architecture. Then, we show the quantitative results on YouTube-VOS dataset. Finally, we provide more qualitative results of IPN [3] and MANet [2] on DAVIS dataset [4] and YouTube-VOS dataset [5].

**Network architecture.** We divide state  $s^t$  into a sequence of  $N$  pairs of segmentation quality  $q^t$  and recommendation history  $h^t$ , and process it frame by frame. The state  $s^t$  is firstly fed into two fully connected layers with both 128 feature dimensions to obtain feature sequence. Then, we use a Bi-Directional LSTM unit with 128 hidden size to capture the temporal information of the feature sequence. Finally,  $Q$  value of each frame is obtained via two fully connected layers with 128 and 1 feature dimensions. The detail of the network architecture is shown in Figure 1.

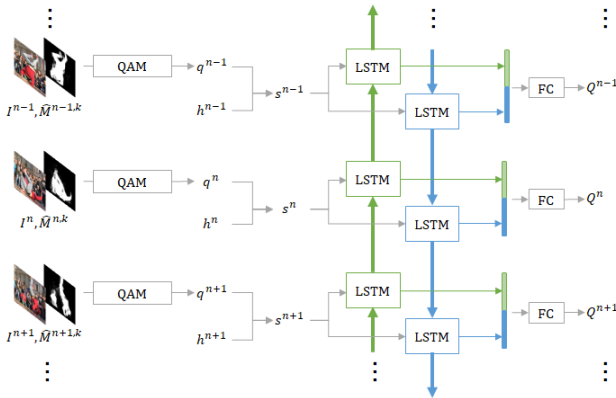

Figure 1. Network architecture. QAM denotes the segmentation quality assessment module.

**Quantitative results.** Figure 2 shows the curves of the

$\mathcal{J}\&\mathcal{F}$  versus the number of rounds on YouTube-VOS dataset.

**Qualitative results.** We show more qualitative results for the IPN [3] and MANet [2] in Figure 3a and 3b. Similar to the case of ATNet [1], the interactive video object segmentation algorithms combined with our agent can produce more accurate segmentation masks.

## References

- [1] Yuk Heo, Yeong Jun Koh, and Chang-Su Kim. Interactive video object segmentation using global and local transfer modules. In *ECCV*, pages 297–313, 2020. 1, 2
- [2] Jiaxu Miao, Yunchao Wei, and Yi Yang. Memory aggregation networks for efficient interactive video object segmentation. In *CVPR*, pages 10366–10375, 2020. 1, 2
- [3] Seoung Wug Oh, Joon-Young Lee, Ning Xu, and Seon Joo Kim. Fast user-guided video object segmentation by interaction-and-propagation networks. In *CVPR*, pages 5247–5256, 2019. 1, 2
- [4] Jordi Pont-Tuset, Federico Perazzi, Sergi Caelles, Pablo Arbeláez, Alexander Sorkine-Hornung, and Luc Van Gool. The 2017 davis challenge on video object segmentation. *CoRR*, abs/1704.00675, 2017. 1
- [5] Ning Xu, Linjie Yang, Yuchen Fan, Jianchao Yang, Dingcheng Yue, Yuchen Liang, Brian Price, Scott Cohen, and Thomas Huang. Youtube-vos: Sequence-to-sequence video object segmentation. In *ECCV*, pages 585–601, 2018. 1

\*Corresponding author.

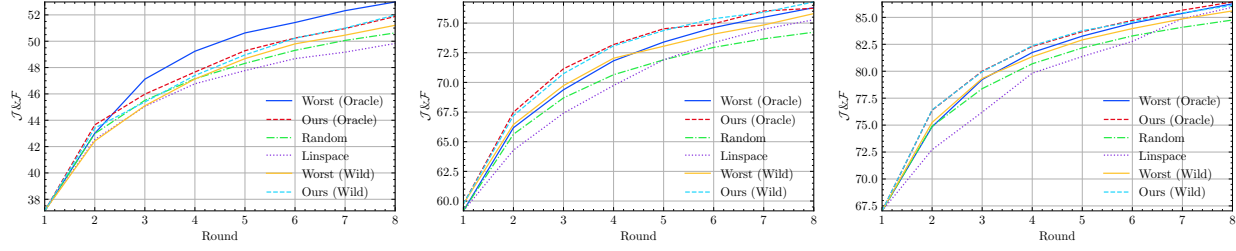

(a) IPN [3]

(b) MANet [2]

(c) ATNet [1]

Figure 2. The curve of  $\mathcal{J}\&\mathcal{F}$  versus the number of rounds on YouTube-VOS dataset.

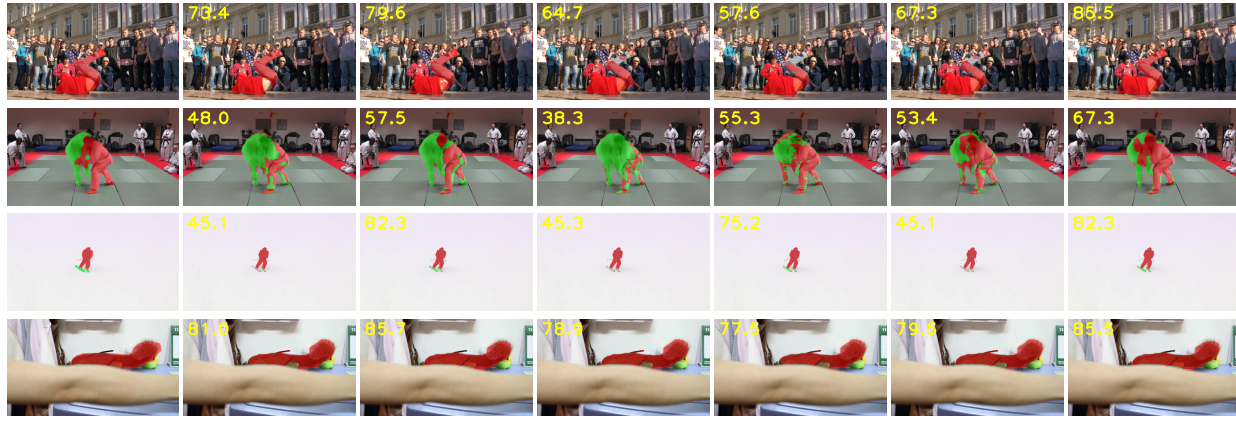

(a) IPN [3].

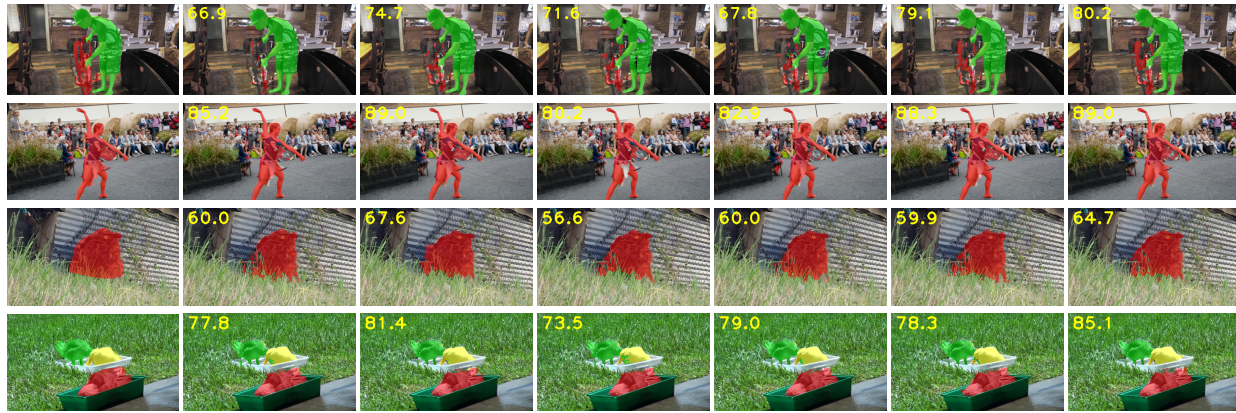

(b) MANet [2].

Figure 3. Qualitative comparison on DAVIS (first two rows) and YouTube-VOS dataset (the last two rows). All result masks are sampled after 8 rounds. The ground truth is available (“Oracle”) in the second and third columns, while the ground truth is unknown (“Wild”) in the last four columns. We show the segmentation quality  $\mathcal{J}\&\mathcal{F}$  on each frame.
